# Supplementary material for: Role of Long-Range Protein Dynamics in Different Thymidylate Synthase Catalyzed Reactions
Source: PubMed Central journal article supplement (PMC4425018; doi:10.3390/ijms16047304), 2015-04-01
Supplement: ijms-16-07304-s001.pdf [file ijms-16-07304-s001.pdf]

## Supplementary Information

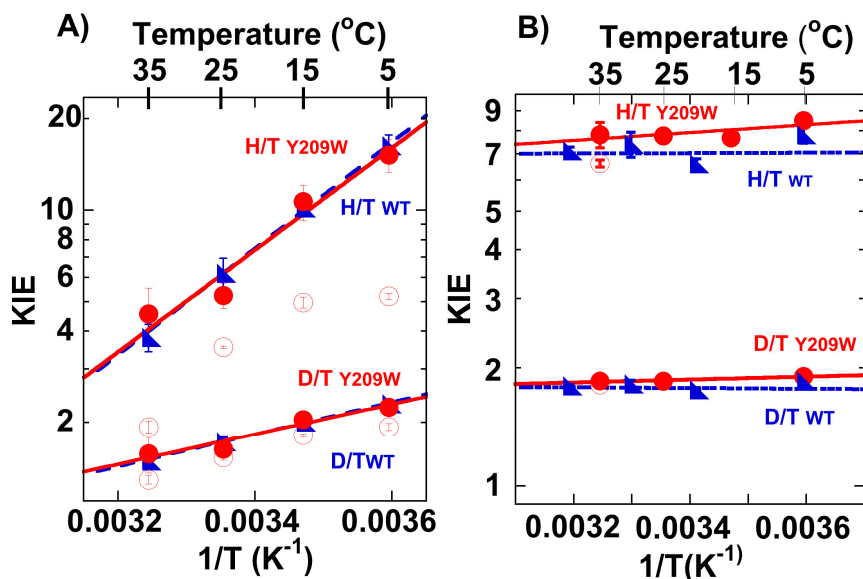

**Figure S1.** Arrhenius plots of the primary KIEs on the proton abstraction (A) catalyzed by WT [16] (blue) and Y209W (red) TSase and the hydride transfer (B) catalyzed by the WT [25] (blue) and Y209W [15] (red) TSase. The lines represent the least-squares nonlinear regression of the intrinsic KIEs to Equation (5) in the main text. The empty circles represent the observed KIEs, and filled circles represent the KIE<sub>intS</sub>. (B) is adapted from [15] with permission from ACS.

### Analysis of Products in the Proton Abstraction Step

We used an Agilent Technologies model 1100 HPLC system with a Supelco Discovery<sup>®</sup> C18 reverse phase column.

HPLC mobile phase solutions: A = 20 mM TEAA buffer (pH = 5.0); B = Acetonitrile.

**Table S1.** HPLC mobile phase gradient (flow rate 0.8 mL/min).

| Time (min) | % A  | % B |
|------------|------|-----|
| 0          | 100  | 0   |
| 5          | 99.5 | 0.5 |
| 20         | 99   | 1   |
| 25         | 90   | 10  |
| 30         | 50   | 50  |
| 35         | 50   | 50  |

**Table S2.** KIE on the proton transfer catalyzed by Y209W.

| Temperature (°C) | Observed KIE    |                 | Intrinsic KIE    |                 |
|------------------|-----------------|-----------------|------------------|-----------------|
|                  | H/T KIE         | D/T KIE         | H/T KIE          | D/T KIE         |
| 5                | $5.21 \pm 0.13$ | $1.93 \pm 0.05$ | $15.19 \pm 1.86$ | $2.24 \pm 0.13$ |
| 15               | $4.97 \pm 0.21$ | $1.81 \pm 0.02$ | $10.67 \pm 1.43$ | $2.04 \pm 0.1$  |
| 25               | $3.54 \pm 0.05$ | $1.53 \pm 0.03$ | $5.24 \pm 0.48$  | $1.63 \pm 0.04$ |
| 35               | $1.93 \pm 0.09$ | $1.29 \pm 0.04$ | $4.56 \pm 0.99$  | $1.57 \pm 0.21$ |
